# Supplementary material for: Polyketides from the Halotolerant Fungus Myrothecium sp. GS-17
Source: MDPI journal article supplement (doi:10.3390/molecules181215126), 2013-12-06

## Supplementary Materials

**Figure S1.** The  $^1\text{H}$ -NMR Spectrum of Compound **1** in  $\text{DMSO}-d_6$ .

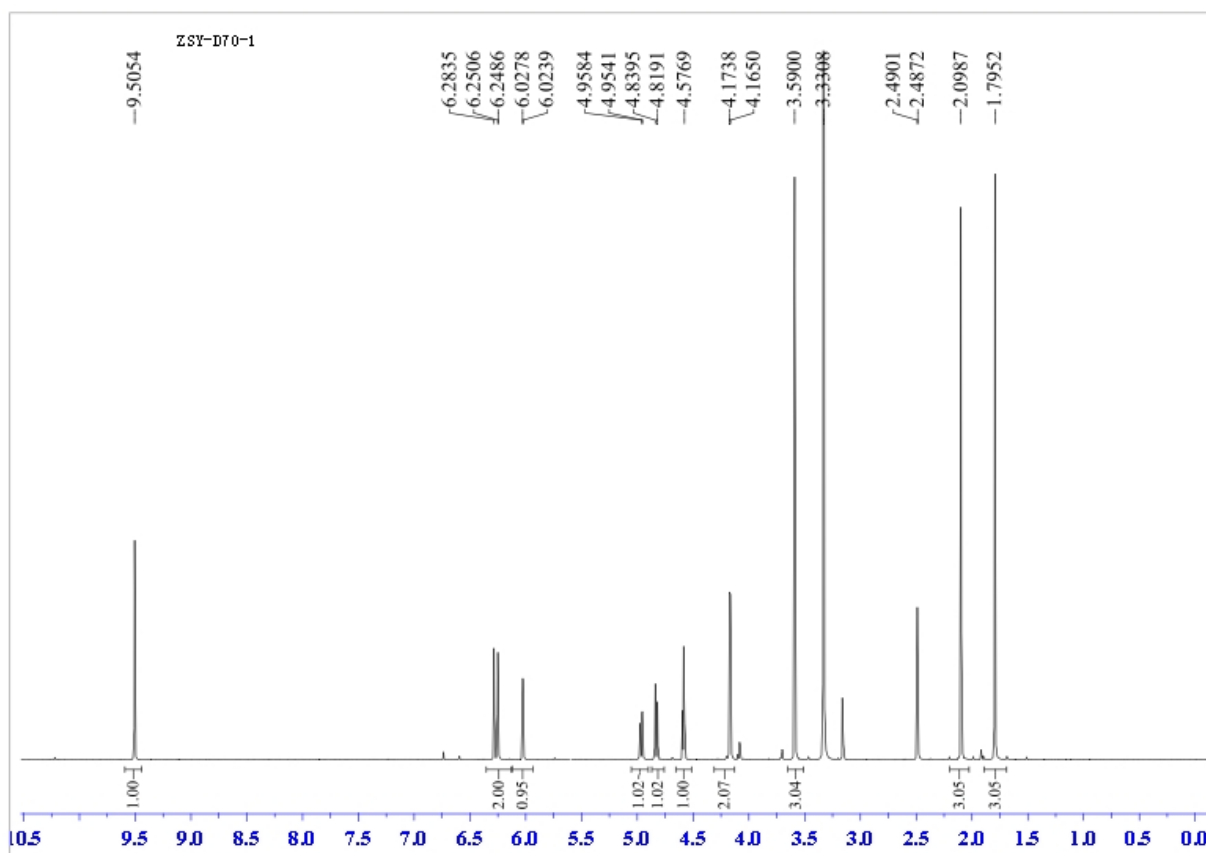

**Figure S2.** The  $^{13}\text{C}$ -NMR Spectrum of Compound **1** in  $\text{DMSO}-d_6$ .

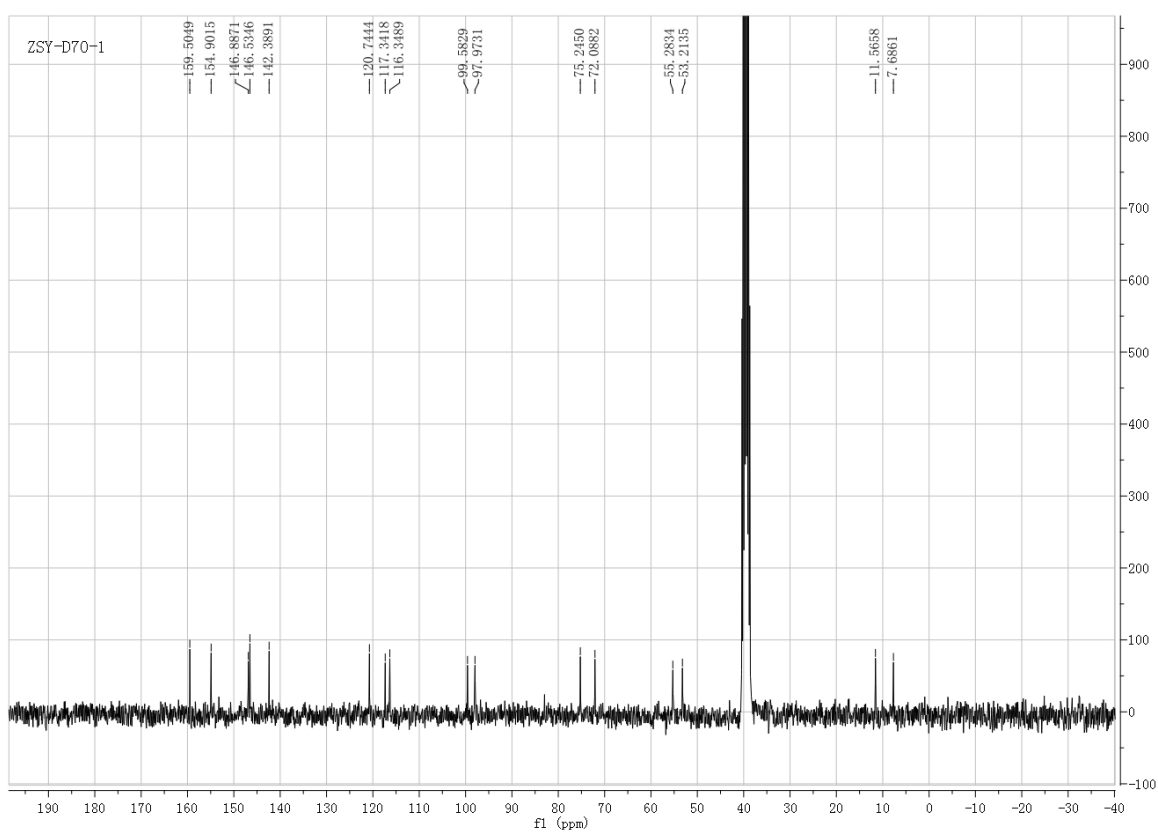

**Figure S3.** The HSQC Spectrum of Compound **1** in DMSO- $d_6$ .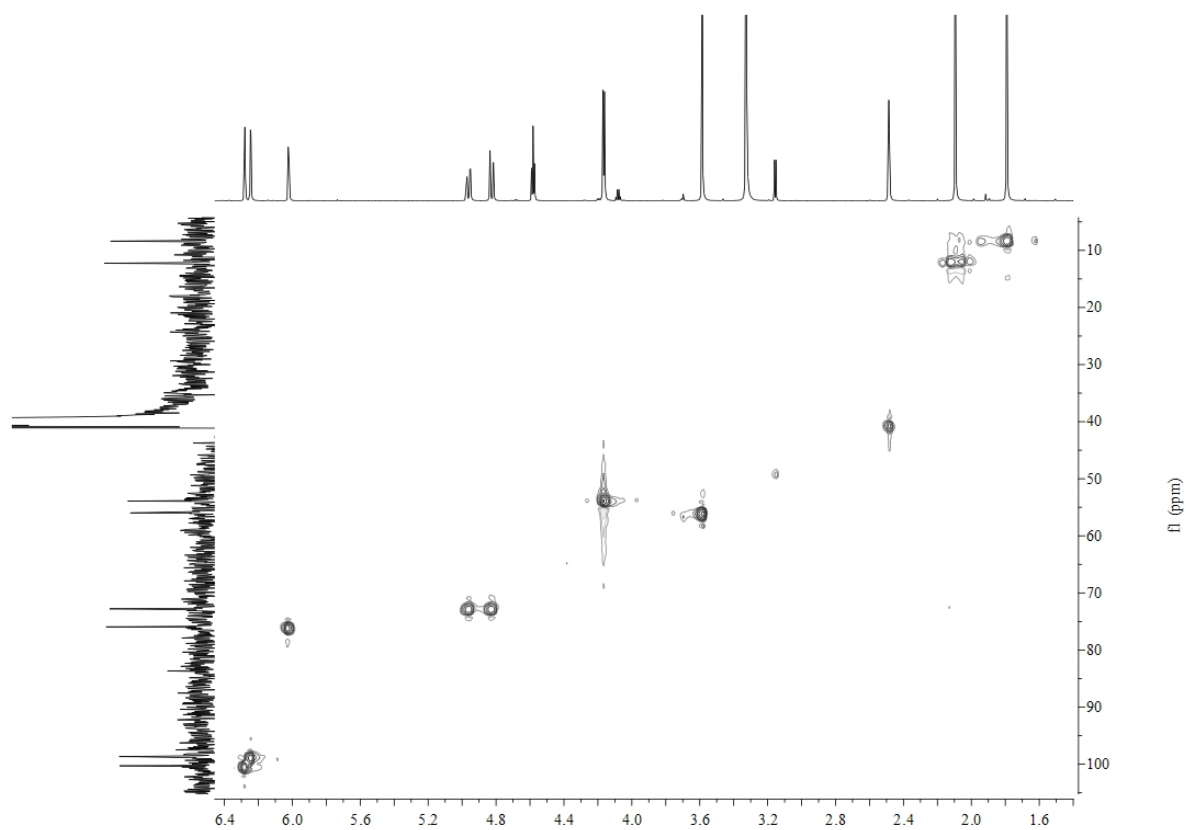**Figure S4.** The HMBC Spectrum of Compound **1** in DMSO- $d_6$ .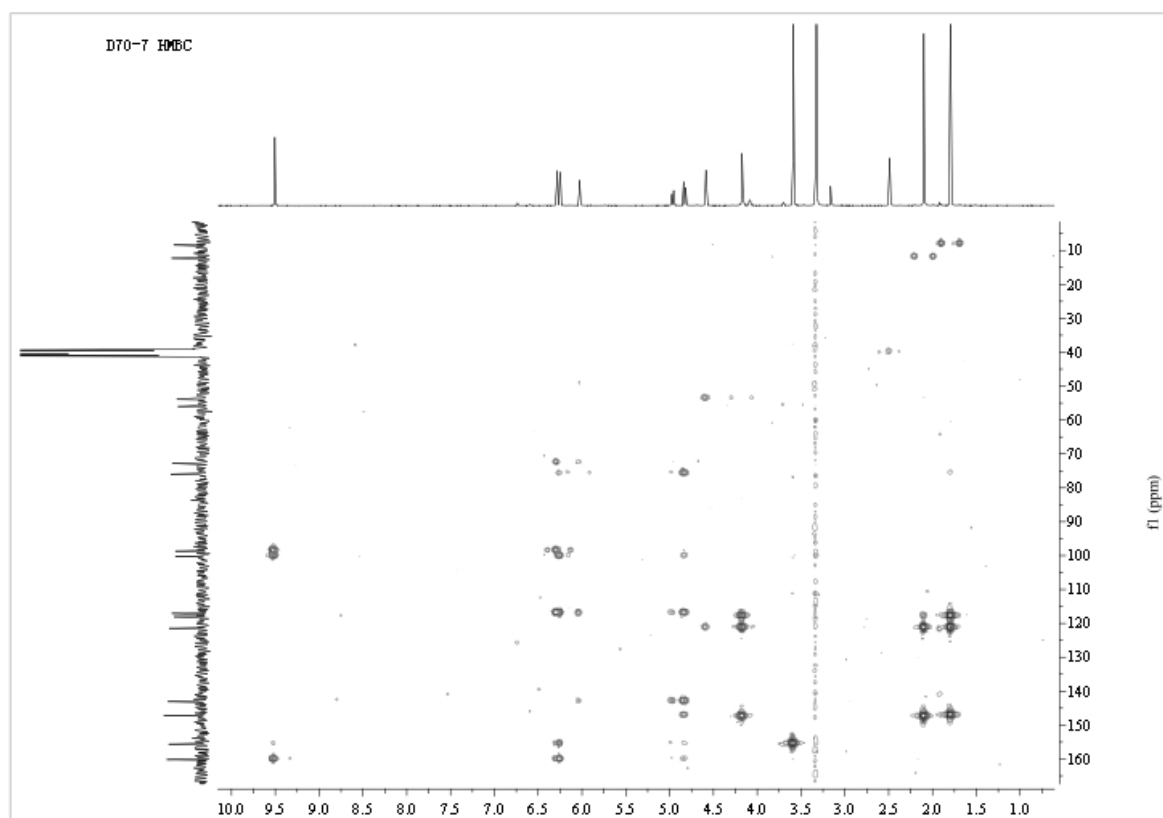

**Figure S5.** The  $^1\text{H}$ - $^1\text{H}$  COSY Spectrum of Compound **1** in  $\text{DMSO-}d_6$ .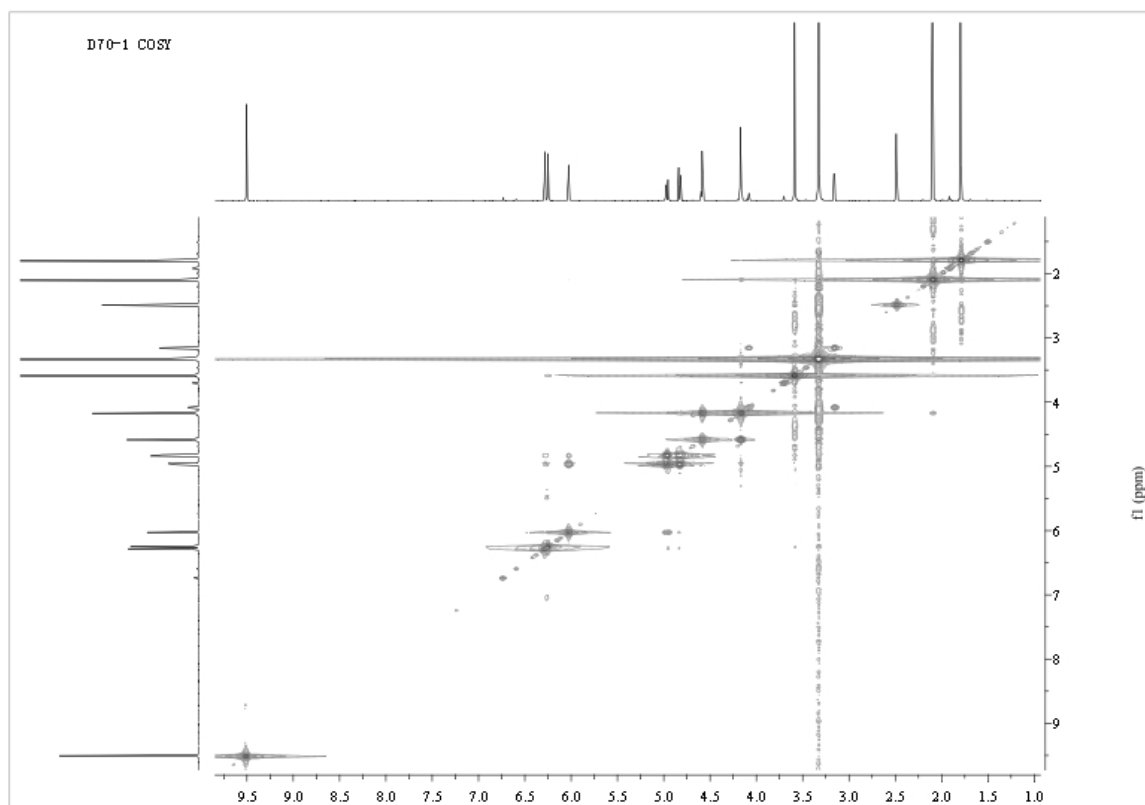**Figure S6.** The NOESY Spectrum of Compound **1** in  $\text{DMSO-}d_6$ .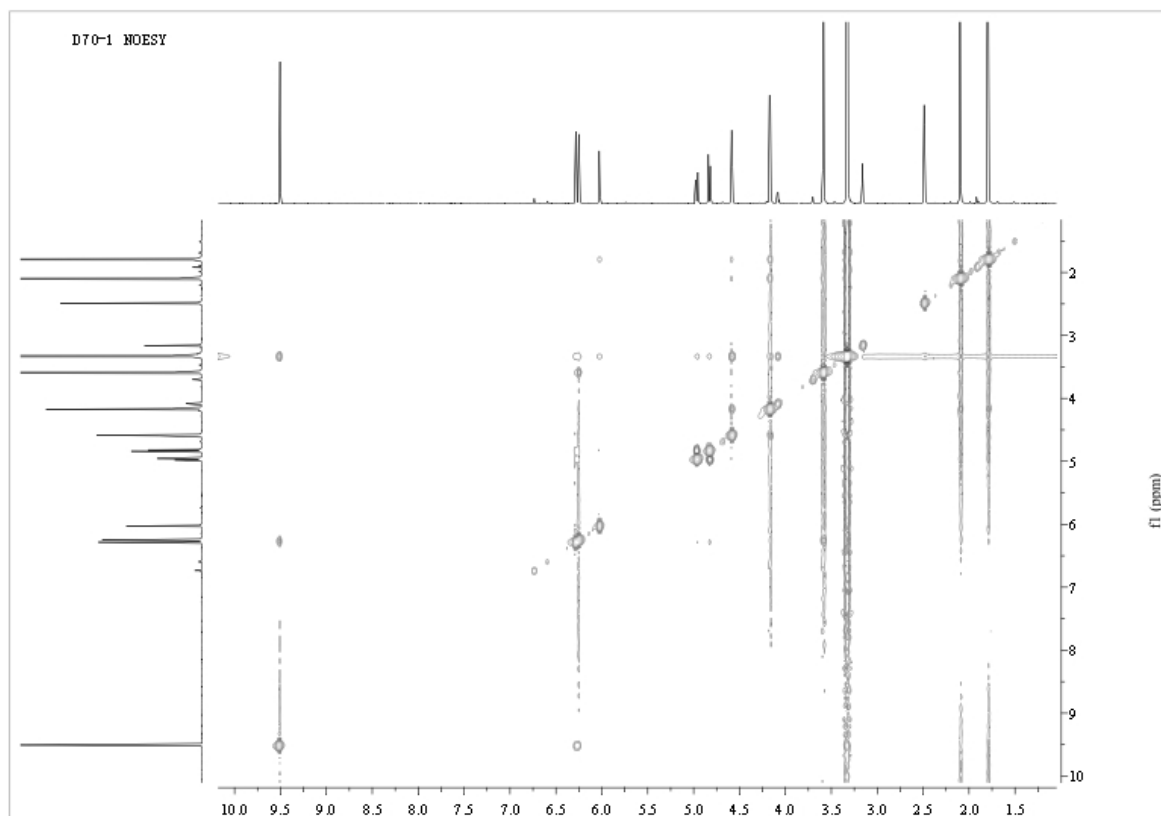

Figure S7. The IR Spectrum of Compound 1.

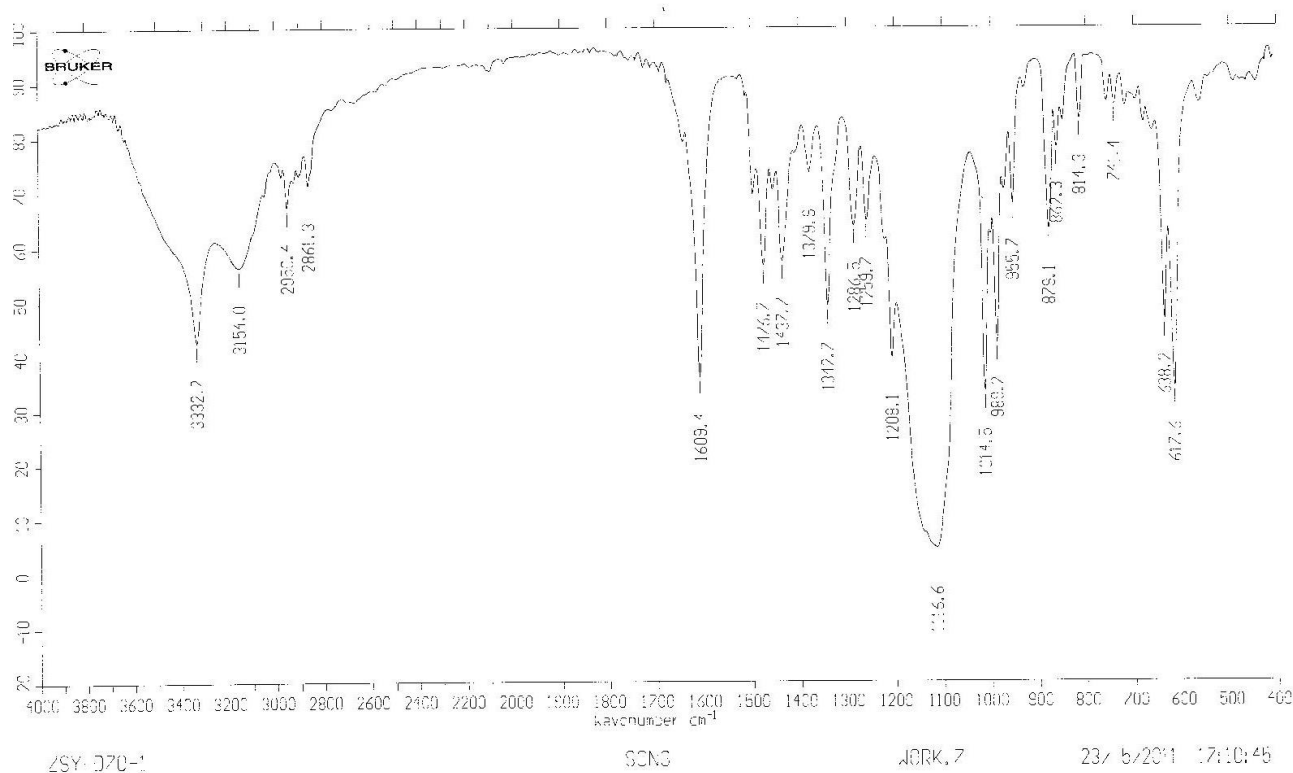

Figure S8. The HRESI-MS Spectrum of Compound 1.

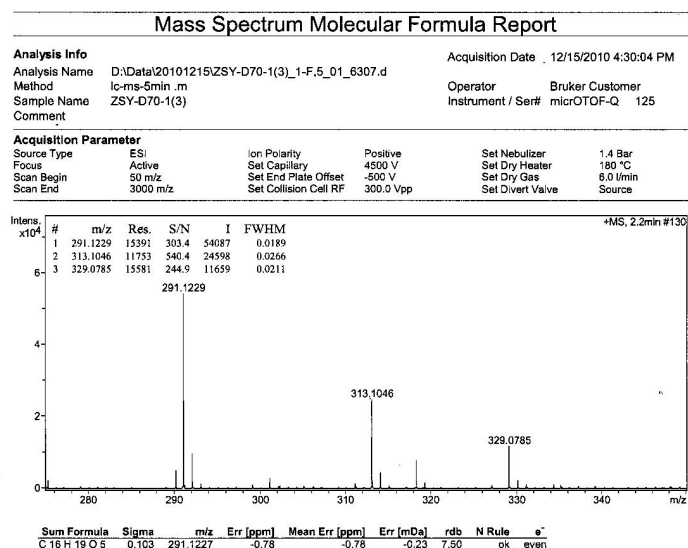

**Figure S9.** The  $^1\text{H}$ -NMR Spectrum of Compound **2** in  $\text{DMSO}-d_6$ .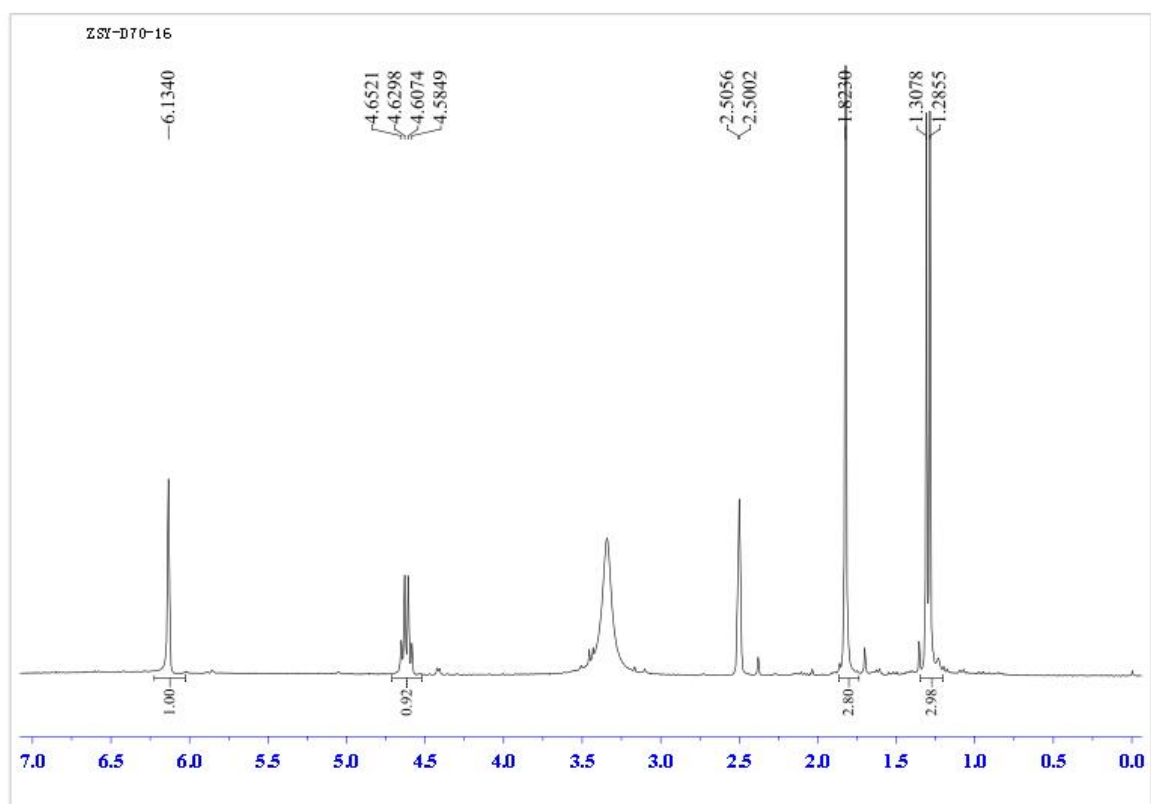**Figure S10.** The  $^{13}\text{C}$ -NMR Spectrum of Compound **2** in  $\text{DMSO}-d_6$ .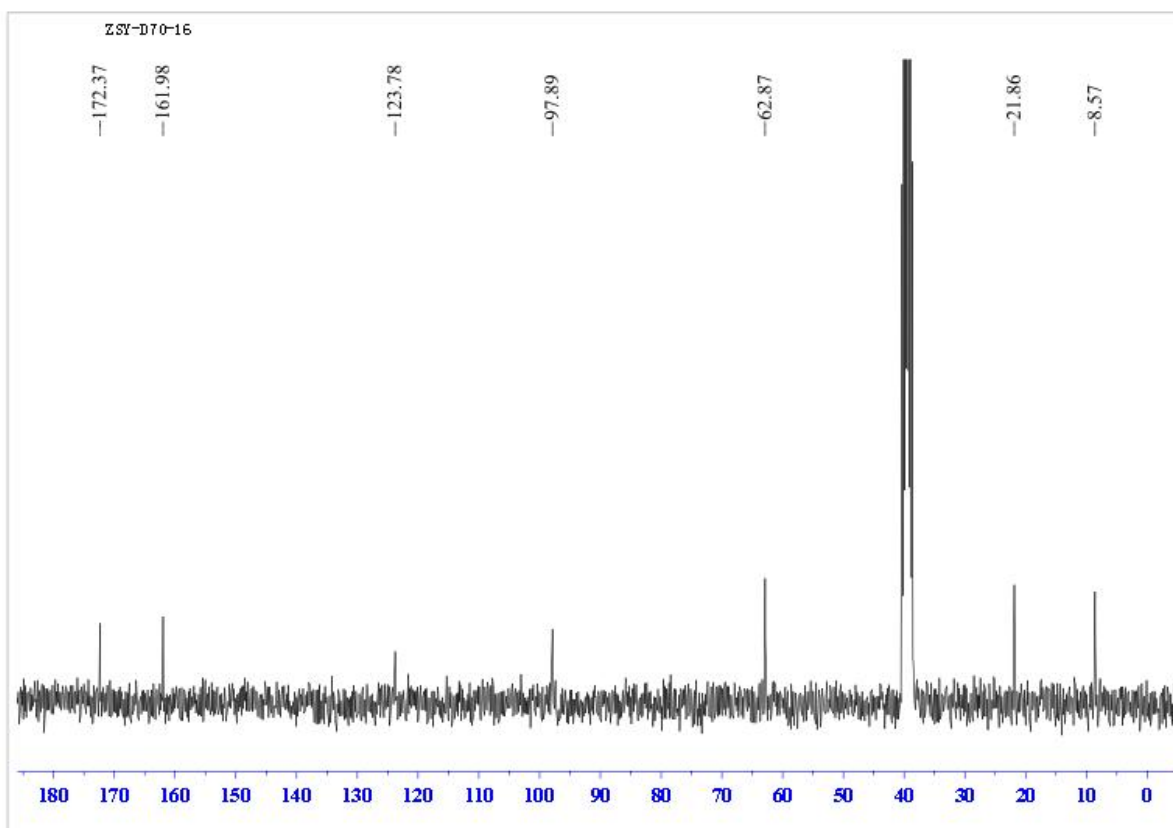

**Figure S11.** The HSQC Spectrum of Compound **2** in DMSO- $d_6$ .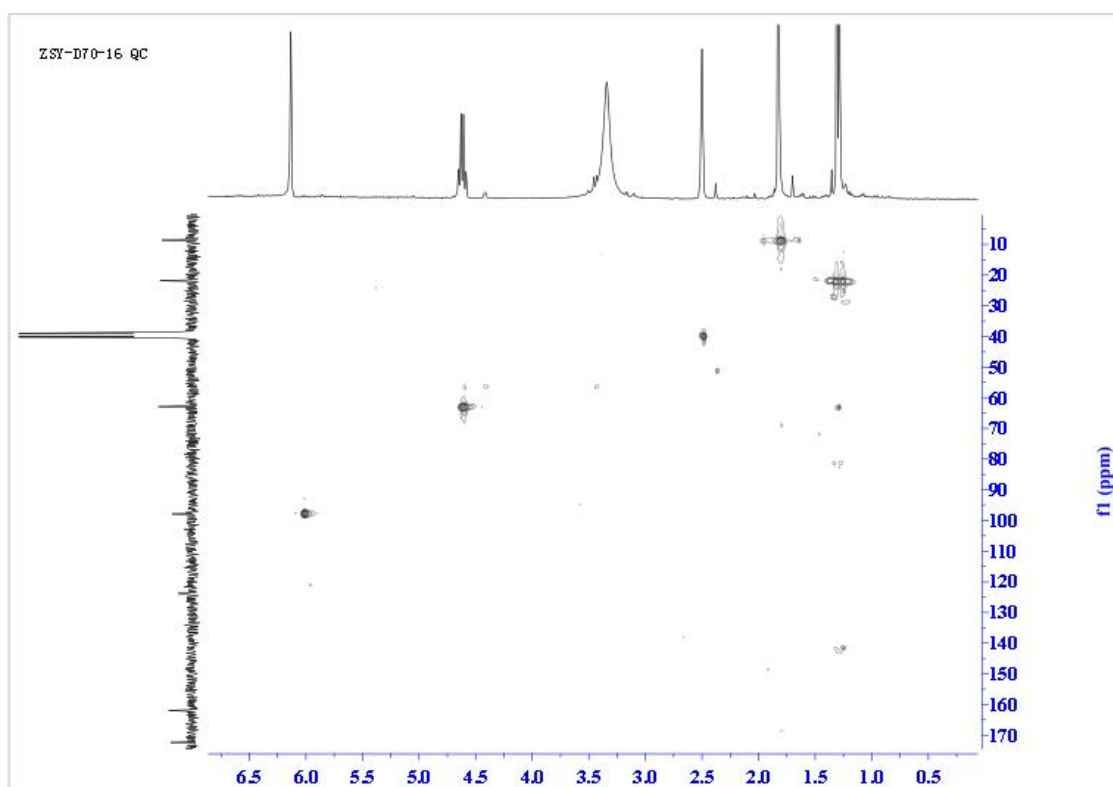**Figure S12.** The HMBC Spectrum of Compound **2** in DMSO- $d_6$ .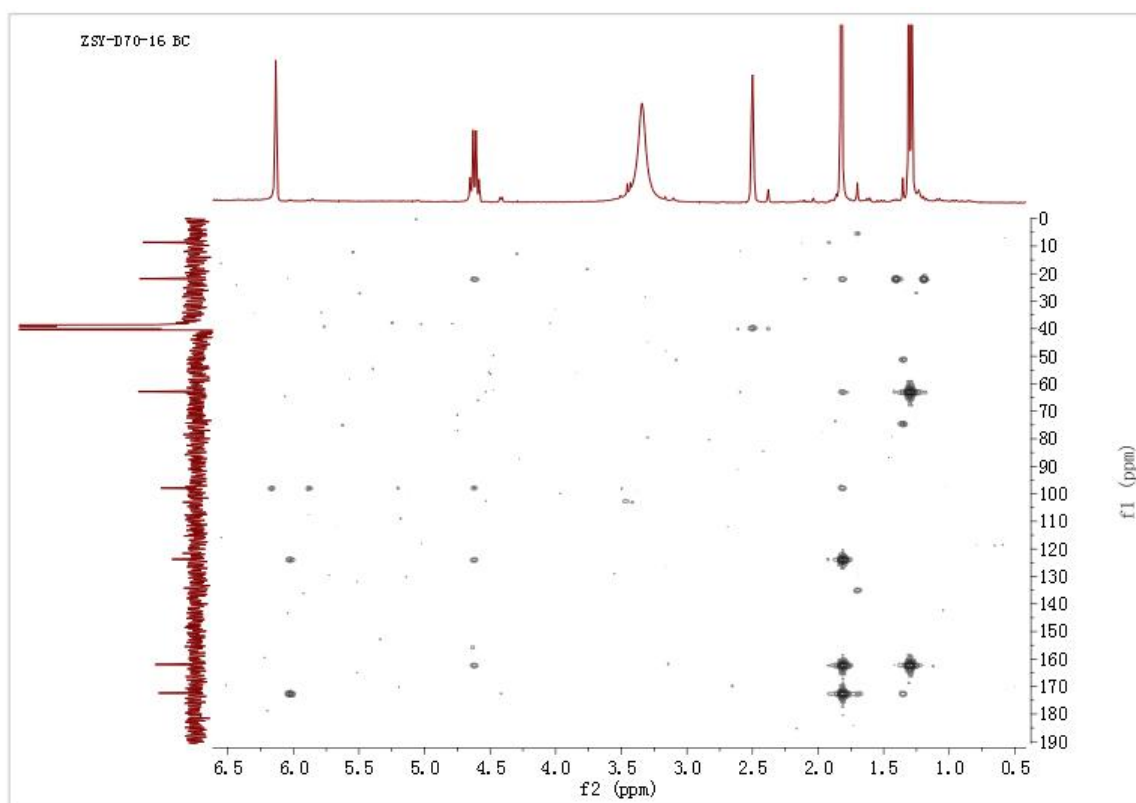

**Figure S13.** The IR Spectrum of Compound 2.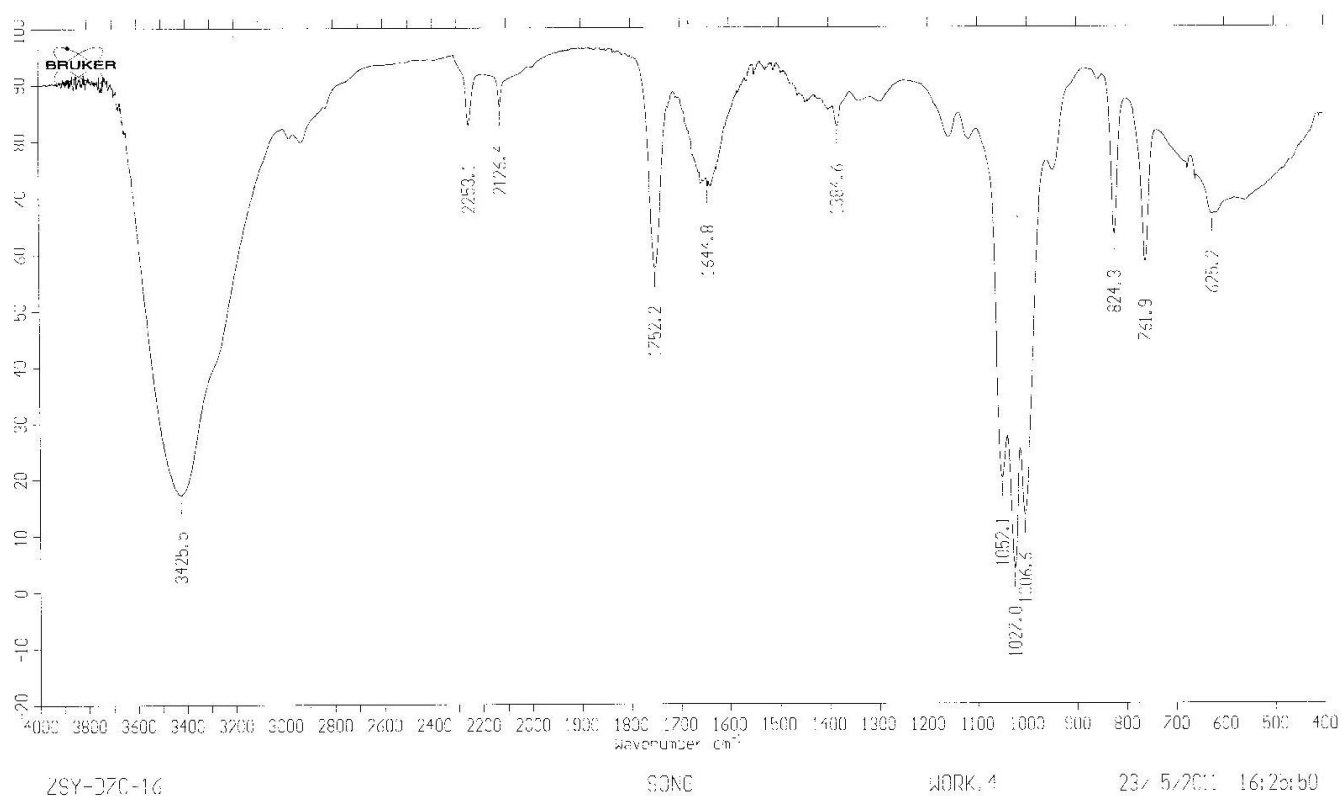**Figure S14.** The UV Spectrum of Compound 2 in MeOH.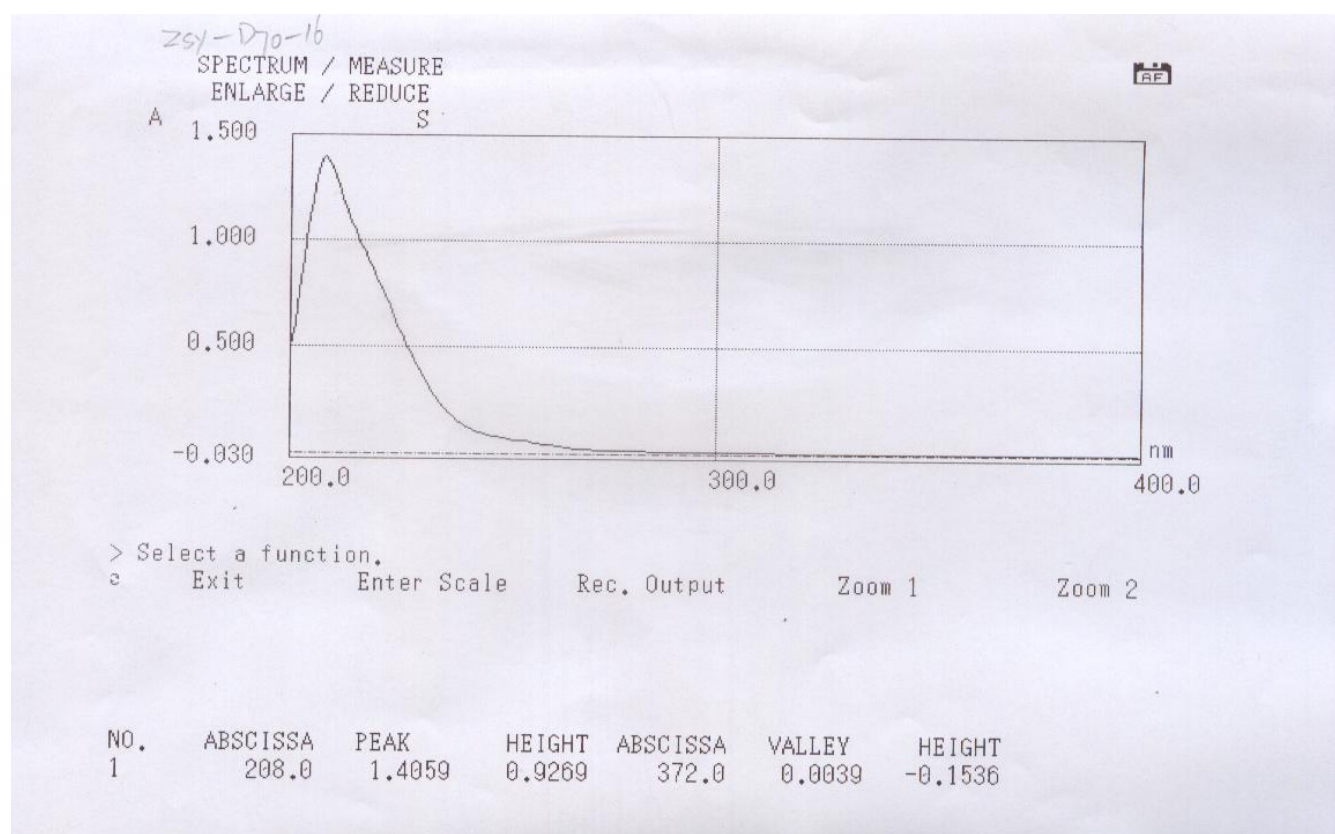

**Figure S15.** The ESI-MS Spectrum of Compound 2.**Direct Mass Spectrometry Analysis**

**Analysis Name:** 11042604.d  
**Sample Name:** ZSY-D70-16

**Instrument:** LC-MSD-Trip-SL  
**Operator:** admin

**Print Date:** 4/26/2011 7:57:23 PM  
**Acq. Date:** 4/26/2011 7:55:40 PM

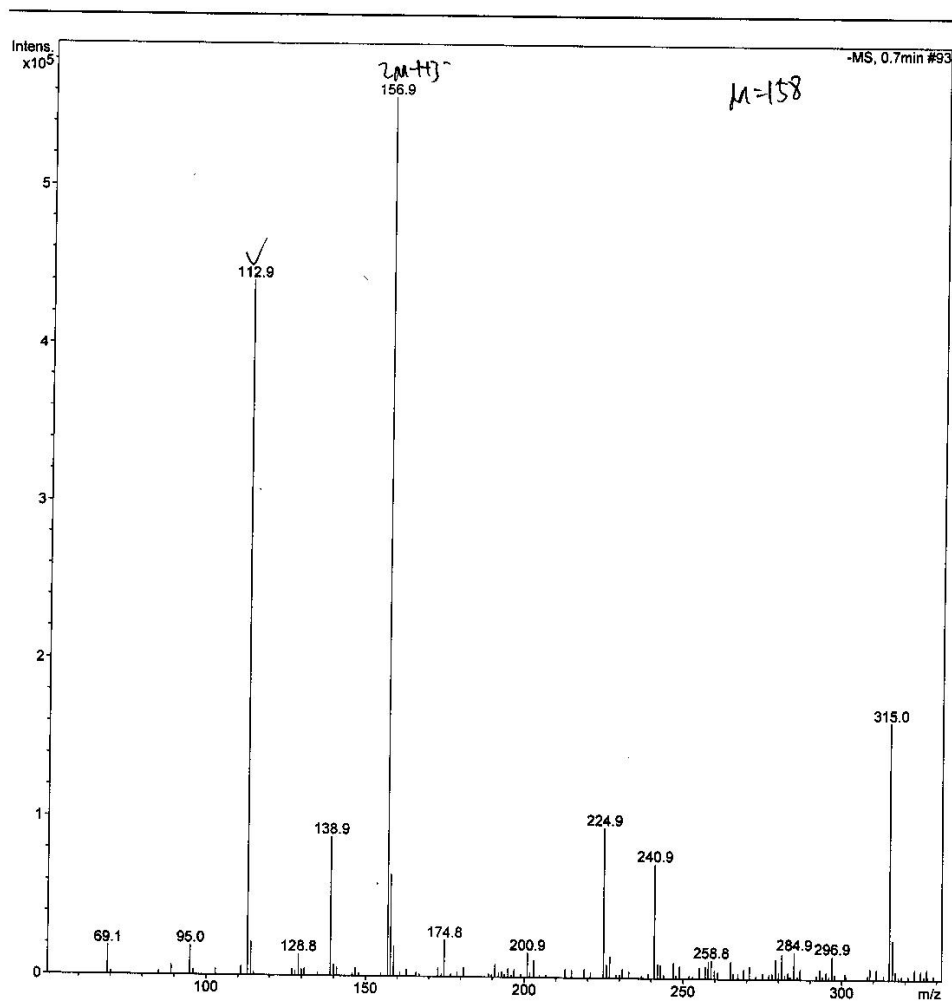

Figure S16. The HRESI-MS Spectrum of Compound 2.

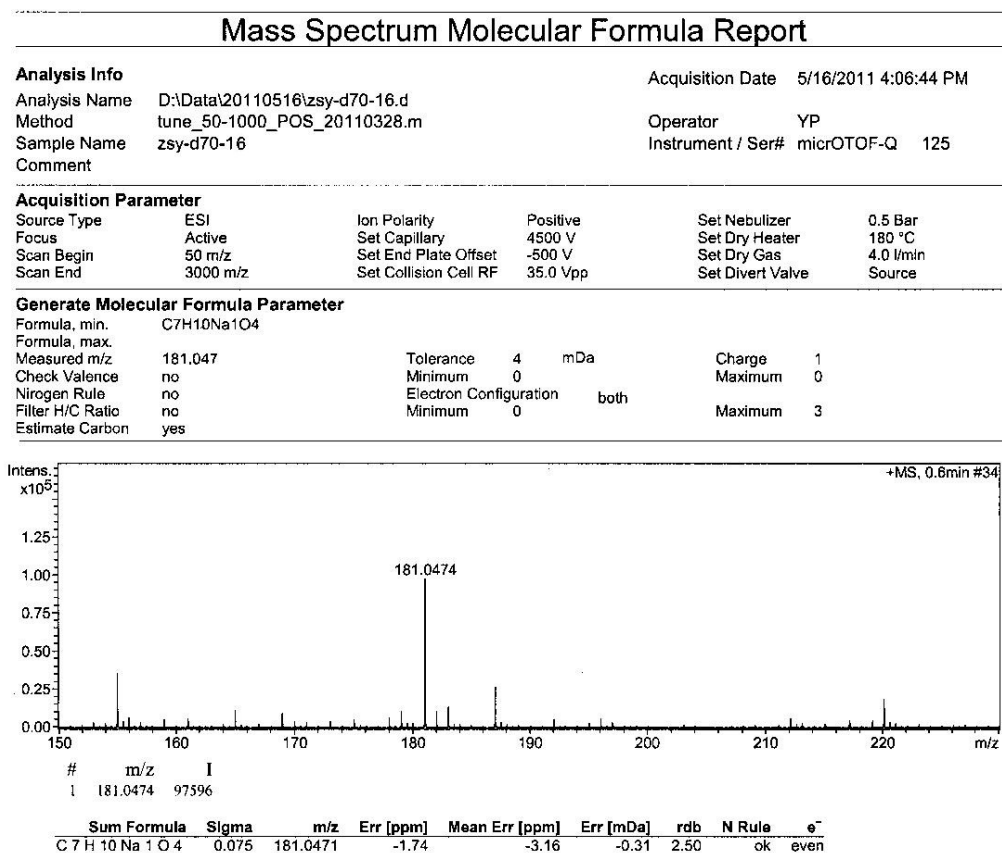

Supplement: s1 [file s1]
